# Supplementary material
Source: PubMed Central journal article supplement (PMC5974495)
Supplement: JVI.00353-18_zjv012183590s1.pdf [file JVI.00353-18_zjv012183590s1.pdf]

**Supplementary Table. Cytosolic SV40-interacting host components**

| Gene                | Annotation                                                   | Gene      | Annotation                                           |
|---------------------|--------------------------------------------------------------|-----------|------------------------------------------------------|
| PLEC                | Plectin                                                      | GTF2I     | General transcription factor II-I                    |
| FLNC                | Filamin-C                                                    | UBA2      | SUMO-activating enzyme subunit 2                     |
| DYNC1H1             | Cytoplasmic dynein 1 heavy chain 1                           | TPI1      | Triosephosphate isomerase                            |
| MYH9                | Myosin-9                                                     | EFTUD2    | 116 kDa U5 small nuclear ribonucleoprotein component |
| FLNA                | Filamin-A                                                    | MGEA5     | Protein O-GlcNAcase                                  |
| TLN1                | Talin-1                                                      | KIF3B     | Kinesin-like protein KIF3B                           |
| FLNB                | Filamin-B                                                    | PLIN3     | Perilipin-3                                          |
| CKAP5               | Cytoskeleton-associated protein 5                            | SUPT16H   | FACT complex subunit SPT16                           |
| GCN1                | eIF-2- $\alpha$ kinase activator                             | FKBP15    | FK506-binding protein 15                             |
| EIF4G1              | Eukaryotic translation initiation factor 4- $\gamma$ 1       | ESPL1     | Separin                                              |
| SPTAN1              | Spectrin $\alpha$ -chain, non-erythrocytic 1                 | VASP      | Vasodilator-stimulated phosphoprotein                |
| CNOT1               | CCR4-NOT transcription complex subunit 1                     | QKI       | Protein quaking                                      |
| HNRNPM              | Heterogeneous nuclear ribonucleoprotein M                    | OLA1      | Obg-like ATPase 1                                    |
| VPS13C              | Vacuolar protein sorting-associated protein 13C              | ATP5B     | ATP synthase subunit- $\beta$ , mitochondrial        |
| EPRS                | Bifunctional glutamate/proline-tRNA ligase                   | MCM2      | DNA replication licensing factor MCM2                |
| CLTC                | Clathrin heavy chain 1                                       | RBM27     | RNA-binding protein 27                               |
| SPTBN1              | Spectrin $\beta$ -chain, non-erythrocytic 1                  | SHB       | SH2 domain-containing adapter protein B              |
| CAD                 | CAD protein                                                  | PSMD6     | 26S proteasome non-ATPase regulatory subunit 6       |
| UBR4                | E3 ubiquitin-protein ligase                                  | CCAR2     | Cell cycle and apoptosis regulator protein 2         |
| HKDC1               | Putative hexokinase                                          | RFC4      | Replication factor C subunit 4                       |
| ACACA               | Acetyl-CoA carboxylase 1                                     | PSMB5     | Proteasome subunit- $\beta$ type-5                   |
| HSPA8, Hsc70        | Heat shock cognate 71 kDa protein                            | PTPN23    | Tyrosine-protein phosphatase non-receptor type 23    |
| PABPC1              | Polyadenylate-binding protein 1                              | RAB14     | Ras-related protein Rab-14                           |
| MACF1               | Microtubule-actin cross-linking factor 1, isoforms 1/2/3/5   | MOV10     | Putative helicase MOV-10                             |
| LMNA                | Prelamin-A/C                                                 | DHX30     | Putative ATP-dependent RNA helicase                  |
| KIF5B               | Kinesin-1 heavy chain                                        | COPB1     | Coatomer subunit- $\beta$                            |
| MTHFD1              | C-1-tetrahydrofolate synthase                                | PSMD14    | 26S proteasome non-ATPase regulatory subunit 14      |
| BAG6                | Large proline-rich protein                                   | ADD1      | $\alpha$ -Adducin                                    |
| PHLDB2              | Pleckstrin homology-like domain family B member 2            | RPS4Y1    | 40S ribosomal protein S4, Y isoform 1                |
| UPF1                | Regulator of nonsense transcripts 1                          | NDE1/NUDE | Nuclear distribution protein nudE homolog 1          |
| EIF3A               | Eukaryotic translation initiation factor 3 subunit A         | DCDC2     | Doublecortin domain-containing protein 2             |
| COPA                | Coatomer subunit- $\alpha$                                   | TLN2      | Talin-2                                              |
| NCL                 | Nucleolin                                                    | RPL13     | 60S ribosomal protein L13                            |
| EEF2                | Elongation factor 2                                          | PSMD12    | 26S proteasome non-ATPase regulatory subunit 12      |
| LARS                | Leucine-tRNA ligase, cytoplasmic                             | CAST      | Calpastatin                                          |
| PGK1                | Phosphoglycerate kinase 1                                    | KIAA1217  | Sickle tail protein homolog                          |
| PRKDC               | DNA-dependent protein kinase catalytic subunit               | EIF4H     | Eukaryotic translation initiation factor 4H          |
| PARP1               | Poly [ADP-ribose] polymerase 1                               | ACTG1     | Actin, cytoplasmic 2                                 |
| ACTA2               | Actin, aortic smooth muscle                                  | EML3      | Echinoderm microtubule-associated protein-like 3     |
| UBA1                | Ubiquitin-like modifier-activating enzyme 1                  | EIF3I     | Eukaryotic translation initiation factor 3 subunit I |
| CLIP2/CYLN2/CLIP155 | CAP-Gly domain-containing linker protein 2                   | IDH1      | Isocitrate dehydrogenase [NADP] cytoplasmic          |
| HSPH1, Hsp105       | Heat shock protein 105 kDa                                   | BUB3      | Mitotic checkpoint protein                           |
| VIM                 | Vimentin                                                     | NAV3      | Neuron navigator 3                                   |
| XRCC6               | X-ray repair cross-complementing protein 6                   | IGF2BP2   | Insulin-like growth factor 2 mRNA-binding protein 2  |
| MYH10               | Myosin-10                                                    | SF3B2     | Splicing factor 3B subunit 2                         |
| USP9X/FAM           | Probable ubiquitin carboxyl-terminal hydrolase FAF-X         | SUGT1     | Protein SGT1 homolog                                 |
| HSPB1               | Heat shock protein- $\beta$ 1                                | AP1B1     | AP-1 complex subunit- $\beta$ 1                      |
| UBAP2L              | Ubiquitin-associated protein 2-like                          | KIF5A     | Kinesin heavy chain isoform 5A                       |
| GAPVD1              | GTPase-activating protein & VPS9 domain-containing protein 1 | RPL7      | 60S ribosomal protein L7                             |
| EEF1G               | Elongation factor 1 $\gamma$                                 | ADAR      | Double-stranded RNA-specific adenosine deaminase     |
| ANLN                | Anillin                                                      | NUP93     | Nuclear pore complex protein Nup93                   |
| DCTN1/p150          | Dynactin subunit 1                                           | RPLP0P6   | 60S acidic ribosomal protein P0-like                 |
| EIF3E               | Eukaryotic translation initiation factor 3 subunit E         | EDC4      | Enhancer of mRNA-decapping protein 4                 |
| KHSRP               | Far upstream element-binding protein 2                       | KIF2A     | Kinesin-like protein KIF2A                           |
| COPG1               | Coatomer subunit- $\gamma$ 1                                 | ARHGEF1   | Rho guanine nucleotide exchange factor 1             |
| RPS3A               | 40S ribosomal protein S3a                                    | MAT2A     | S-adenosylmethionine synthase isoform type-2         |
| ECM29               | Proteasome-associated protein ECM29 homolog                  | BIRC6     | Baculoviral IAP repeat-containing protein 6          |
| PSMC5               | 26S protease regulatory subunit 8                            | MSH6      | DNA mismatch repair protein Msh6                     |

|              |                                                                            |               |                                                                              |
|--------------|----------------------------------------------------------------------------|---------------|------------------------------------------------------------------------------|
| SF3B3        | Splicing factor 3B subunit 3                                               | KNTC1         | Kinetochore-associated protein 1                                             |
| XRCC5        | X-ray repair cross-complementing protein 5                                 | CTNNB1        | Catenin $\beta$ -1                                                           |
| KPNA2        | Importin subunit- $\alpha$ 1                                               | RB1           | Retinoblastoma-associated protein                                            |
| HTT          | Huntingtin                                                                 | TTK           | Dual specificity protein kinase TTK                                          |
| TRIM28       | Transcription intermediary factor 1- $\beta$                               | TRUB1         | Probable tRNA pseudouridine synthase 1                                       |
| SMC2         | Structural maintenance of chromosomes protein 2                            | ARAP1         | Arf-GAP with Rho-GAP domain, ANK repeat & PH domain protein 1                |
| VARS         | Valine-tRNA ligase                                                         | PPP4R1        | Serine/threonine-protein phosphatase 4 regulatory subunit 1                  |
| USP5         | Ubiquitin carboxyl-terminal hydrolase 5                                    | PRUNE1        | Exopolyphosphatase PRUNE1                                                    |
| NPEPPS       | Puromycin-sensitive aminopeptidase                                         | SNX1          | Sorting nexin-1                                                              |
| HSPA2, Hsp70 | Heat shock-related 70 kDa protein 2                                        | KARS          | Lysine-tRNA ligase                                                           |
| FUBP1        | Far upstream element-binding protein 1                                     | ANK3          | Ankyrin-3                                                                    |
| EIF3L        | Eukaryotic translation initiation factor 3 subunit L                       | RASSF2        | Ras association domain-containing protein 2                                  |
| IPO5         | Importin-5                                                                 | GEMIN5        | Gem-associated protein 5                                                     |
| FASN         | Fatty acid synthase                                                        | KIF20A        | Kinesin-like protein KIF20A                                                  |
| DNMT1        | DNA (cytosine-5)-methyltransferase 1                                       | CARD10        | Caspase recruitment domain-containing protein 10                             |
| IPO9         | Importin-9                                                                 | USP10         | Ubiquitin carboxyl-terminal hydrolase 10                                     |
| RTL1         | Retrotransposon-like protein 1                                             | HLTF          | Helicase-like transcription factor                                           |
| RPS4X        | 40S ribosomal protein S4, X isoform                                        | CCDC88A       | Girdin                                                                       |
| NEMF         | Nuclear export mediator factor                                             | POLD1         | DNA polymerase- $\gamma$ catalytic subunit                                   |
| IPO7         | Importin-7                                                                 | SNRPB         | Small nuclear ribonucleoprotein-associated proteins B and B'                 |
| XPO1         | Exportin-1                                                                 | ANP32A        | Acidic leucine-rich nuclear phosphoprotein 32 family member A                |
| PA2G4        | Proliferation-associated protein 2G4                                       | DNAJC9/HDJC9  | DnaJ homolog subfamily C member 9                                            |
| PLCB3        | 1-phosphatidylinositol 4,5-bisphosphate phosphodiesterase- $\beta$ 3       | SAE1          | SUMO-activating enzyme subunit 1                                             |
| ANXA4        | Annexin A4                                                                 | RBPMS         | RNA-binding protein with multiple splicing                                   |
| KIF1A        | Kinesin-like protein KIF1A                                                 | PSMA3         | Proteasome subunit- $\alpha$ type-3                                          |
| RAP1GDS1     | Rap1 GTPase-GDP dissociation stimulator 1                                  | TNS1          | Tensin-1                                                                     |
| DDB1         | DNA damage-binding protein 1                                               | ZSWIM8        | Zinc finger SWIM domain-containing protein 8                                 |
| CLIP1        | CAP-Gly domain-containing linker protein 1                                 | PPP6R3        | Serine/threonine-protein phosphatase 6 regulatory subunit 3                  |
| ATXN10       | Ataxin-10                                                                  | RAB1A         | Ras-related protein Rab-1A                                                   |
| GBF1         | Golgi-specific brefeldin A-resistance guanine nucleotide exchange factor 1 | COG5          | Conserved oligomeric Golgi complex subunit 5                                 |
| MVP          | Major vault protein                                                        | NCOA3         | Nuclear receptor coactivator 3                                               |
| XPOT         | Exportin-T                                                                 | UCHL5         | Ubiquitin carboxyl-terminal hydrolase isozyme L5                             |
| HSPD1/GroEL  | 60 kDa heat shock protein                                                  | CD2BP2        | CD2 antigen cytoplasmic tail-binding protein 2                               |
| RRM2         | Ribonucleoside-diphosphate reductase subunit M2                            | PSMB4         | Proteasome subunit- $\beta$ type-4                                           |
| CDC73        | Parafibromin                                                               | CLUH          | Clustered mitochondria protein homolog                                       |
| STAU2        | Double-stranded RNA-binding protein Staufen homolog 2                      | CNOT9         | CCR4-NOT transcription complex subunit 9                                     |
| XPO5         | Exportin-5                                                                 | LUC7L2        | Putative RNA-binding protein Luc7-like 2                                     |
| TALDO1       | Transaldolase                                                              | PRKAR1A       | cAMP-dependent protein kinase type I- $\alpha$ regulatory subunit            |
| EIF5B        | Eukaryotic translation initiation factor 5B                                | GDI2          | Rab GDP dissociation inhibitor- $\beta$                                      |
| EIF3G        | Eukaryotic translation initiation factor 3 subunit G                       | TXLNA         | $\alpha$ -taxilin                                                            |
| RAVER1       | Ribonucleoprotein PTB-binding 1                                            | RABGAP1       | Rab GTPase-activating protein 1                                              |
| ARCN1        | Coatamer subunit-6                                                         | VCPIP1        | Deubiquitinating protein VCIP135                                             |
| SEPT2        | Septin-2                                                                   | DNAJA1/HDJ2   | DnaJ homolog subfamily A member 1                                            |
| ANKHD1       | Ankyrin repeat and KH domain-containing protein 1                          | LATS1         | Serine/threonine-protein kinase LATS1                                        |
| PSMD4        | 26S proteasome non-ATPase regulatory subunit 4                             | RAB7A         | Ras-related protein Rab-7a                                                   |
| MAP1B        | Microtubule-associated protein 1B                                          | BZW1          | Basic leucine zipper and W2 domain-containing protein 1                      |
| PSMD2        | 26S proteasome non-ATPase regulatory subunit 2                             | 42985         | Septin-7                                                                     |
| PSMD13       | 26S proteasome non-ATPase regulatory subunit 13                            | PPP2R1B       | Serine/threonine-protein phosphatase 2A 65 kDa regulatory subunit A- $\beta$ |
| TPM4         | Tropomyosin $\alpha$ -4 chain                                              | SDE2          | Protein SDE2 homolog                                                         |
| EIF3C        | Eukaryotic translation initiation factor 3 subunit C                       | DOCK7         | Dedicator of cytokinesis protein 7                                           |
| PRPF31       | U4/U6 small nuclear ribonucleoprotein Prp31                                | FXR1          | Fragile X mental retardation syndrome-related protein 1                      |
| EIF3H        | Eukaryotic translation initiation factor 3 subunit H                       | CDK6          | Cyclin-dependent kinase 6                                                    |
| PUM1         | Pumilio homolog 1                                                          | IFI16         | $\gamma$ -interferon-inducible protein 16                                    |
| DNAJC13/RME8 | DnaJ homolog subfamily C member 13                                         | FARSA         | Phenylalanine-tRNA ligase $\alpha$ -subunit                                  |
| ACTN1        | Alpha-actinin-1                                                            | RPS2          | 40S ribosomal protein S2                                                     |
| KIF11        | Kinesin-like protein KIF11                                                 | RANBP2/NUP358 | E3 SUMO-protein ligase                                                       |
| RPS8         | 40S ribosomal protein S8                                                   | PSMB6         | Proteasome subunit- $\beta$ type-6                                           |
| RBM12        | RNA-binding protein 12                                                     | CDKN2AIP      | CDKN2A-interacting protein                                                   |
| SNRNP200     | U5 small nuclear ribonucleoprotein 200 kDa helicase                        | PPP3CA        | Serine/threonine-protein phosphatase 2B catalytic subunit $\alpha$ -isoform  |
| MTCL1        | Microtubule cross-linking factor 1                                         | HSPA4L, Apg-1 | Heat shock 70 kDa protein 4L                                                 |

|            |                                                              |          |                                                                             |
|------------|--------------------------------------------------------------|----------|-----------------------------------------------------------------------------|
| EFL1       | Elongation factor-like GTPase 1                              | PRDX6    | Peroxiredoxin-6                                                             |
| DOCK9      | Dedicator of cytokinesis protein 9                           | ATXN2    | Ataxin-2                                                                    |
| CHTF8      | Chromosome transmission fidelity protein 8 homolog isoform 2 | ARHGAP18 | Rho GTPase-activating protein 18                                            |
| SEC23IP    | SEC23-interacting protein                                    | DYNC112  | Cytoplasmic dynein 1 intermediate chain 2                                   |
| PCNA       | Proliferating cell nuclear antigen                           | CCDC22   | Coiled-coil domain-containing protein 22                                    |
| ACTN4      | $\alpha$ -actinin-4                                          | PPP2R5D  | Serine/threonine-protein phosphatase 2A 56 kDa regulatory subunit- $\gamma$ |
| CTTNBP2    | Cortactin-binding protein 2                                  | NCOR2    | Nuclear receptor corepressor 2                                              |
| NFKB2      | Nuclear factor NF- $\kappa$ B p100 subunit                   | KIFC1    | Kinesin-like protein KIFC1                                                  |
| HIP1R      | Huntingtin-interacting protein 1-related protein             | GNPDA1   | Glucosamine-6-phosphate isomerase 1                                         |
| ANKRD17    | Ankyrin repeat domain-containing protein 17                  | TTC28    | Tetratricopeptide repeat protein 28                                         |
| EIF3B      | Eukaryotic translation initiation factor 3 subunit B         | GIPC1    | PDZ domain-containing protein GIPC1                                         |
| HSP90AB3P  | Putative heat shock protein 90- $\beta$ 3                    | ARFGEF1  | Brefeldin A-inhibited guanine nucleotide-exchange protein 1                 |
| UBE2O      | (E3-independent) E2 ubiquitin-conjugating enzyme             | MAPRE3   | Microtubule-associated protein RP/EB family member 3                        |
| MSH2       | DNA mismatch repair protein                                  | TCAF1    | TRPM8 channel-associated factor 1                                           |
| TARDBP     | TAR DNA-binding protein 43                                   | PDS5A    | Sister chromatid cohesion protein PDS5 homolog A                            |
| PIK3C2A    | PI4P 3-kinase C2 domain-containing subunit- $\alpha$         | IPO4     | Importin-4                                                                  |
| RAB5C/RABL | Ras-related protein Rab-5C                                   | USP25    | Ubiquitin carboxyl-terminal hydrolase 25                                    |
| NUMA1      | Nuclear mitotic apparatus protein 1                          | DST      | Dystonin                                                                    |
| LDHA       | L-lactate dehydrogenase A chain                              | ARFGEF2  | Brefeldin A-inhibited guanine nucleotide-exchange protein 2                 |
| HNRNPF     | Heterogeneous nuclear ribonucleoprotein F                    | TNS3     | Tensin-3                                                                    |
| CSDE1      | Cold shock domain-containing protein E1                      | RILPL1   | RILP-like protein 1                                                         |
| PRRC2B     | Protein PRRC2B                                               | LARP1    | La-related protein 1                                                        |
| TAGLN2     | Transgelin-2                                                 | TRIP13   | Pachytene checkpoint protein 2 homolog                                      |
| HSP90AB1   | Heat shock protein 90- $\beta$                               | NF1      | Neurofibromin                                                               |
| SRP68      | Signal recognition particle subunit 68                       | TPT1     | Translationally-controlled tumor protein                                    |
